# Supplementary material
Source: Springer Nature journal article supplement (https://www.springermedizin.de/resource/supplementary/12967_2012_1637_MOESM8_ESM.pdf/9574458)

# LIN28B mRNA

$\log_{10}(\text{post-tx} / \text{pre-tx})$

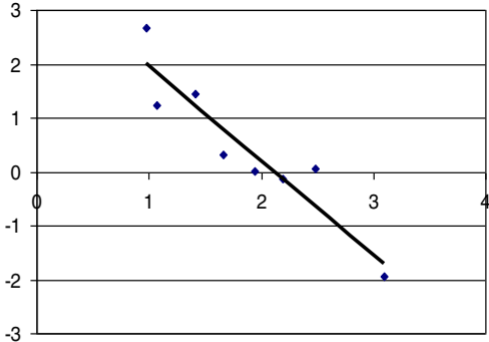

*let-7b* (fold change)

Supplement: MOESM8 [file 9574458]
